# Supplementary material
Source: publisher figshare collection journal article supplement (https://gsajournals.figshare.com/ndownloader/files/28060611)
Supplement: Supplementary file 1 [file 28060611]

## Sheet: Sheet1
Table S3 Repeats statistics for Candidula genome obtained with RepeatMasker
			Number of elements*	length occupied	percentage of sequence
Retroelements			1659679	405004034 bp	29.85 %
	SINEs:		344582	57419126 bp	4.23 %
	Penelope		17460	4937548 bp	0.36 %
	LINEs:		1295787	339512432 bp	25.03 %
		CRE/SLACS	0	0 bp	0.00 %
		L2/CR1/Rex	9045	3399190 bp	0.25 %
		R1/LOA/Jockey	281138	82777603 bp	6.10 %
		R2/R4/NeSL	16200	10678711 bp	0.79 %
		RTE/Bov-B	910980	220721368 bp	16.27 %
		L1/CIN4	0	0 bp	0.00 %
	LTR elements:		19310	8072476 bp	0.60 %
		BEL/Pao	0	0 bp	0.00 %
		Ty1/Copia	7504	651205 bp	0.05 %
		Gypsy/DIRS1	10784	6875420 bp	0.51 %
		Retroviral	0	0 bp	0.00 %
DNA transposons			263872	55634831 bp	4.10 %
	hobo-Activator		132924	24572776 bp	1.81 %
	Tc1-IS630-Pogo		93284	20350518 bp	1.50 %
	En-Spm		0	0 bp	0.00 %
	MuDR-IS905		0	0 bp	0.00 %
	PiggyBac		2489	910315 bp	0.07 %
	Tourist/Harbinger		0	0 bp	0.00 %
	Other (Mirage, P-element, Transib)		5067	1399572 bp	0.10 %
Rolling-circles			29774	11679594 bp	0.86 %
Unclassified:			1349820	252282984 bp	18.60 %
Total interspersed repeats:				712921849 bp	52.55 %
Small RNA:			290215	45505614 bp	3.35 %
Satellites:			5293	1232527 bp	0.09 %
Simple repeats:			635562	85752006 bp	6.32 %
Low complexity:			49470	4729025 bp	0.35 %
* most repeats fragmented by insertions or deletions have been counted as one element
RepeatMasker Combined Database: Dfam_3.1, RepBase-20181026
sequences: 8586
total length: 1356663438 bp (1345250408 bp excl N/X-runs)
GC level: 40.69 %
bases masked: 819377022 bp (60.40 %)
run with rmblastn version 2.9.0+
The query was compared to classified sequences in ".../Candidula_unifasciata-families.fa"
